# Supplementary material
Source: ML conference proceedings conference paper supplement (https://proceedings.neurips.cc/paper_files/paper/2017/hash/f0935e4cd5920aa6c7c996a5ee53a70f-Abstract.html)
Supplement: Supplementary file [file f0935e4cd5920aa6c7c996a5ee53a70f-Supplemental.zip]

## Appendix

### Proof of Theorem 1

We define the regret when the algorithm selects the  $i$ th item for user  $j$

$$r_{i,j} = \sup_{x \in \Omega} \Delta(x|S_{i-1,j}, \phi_j) - \Delta(x_{i,j}|S_{i-1,j}, \phi_j).$$

At this time, the accumulated regret for user  $j$  by the end of the  $i$ th selection is

$$R_{i,j} = \sum_{l=1}^i r_{l,j}$$

and the algorithm has selected

$$S_{i,j} = \{x_{1,j}, x_{2,j}, \dots, x_{i,j}\}$$

for user  $j$ .

In light of the monotonicity of  $f_{\phi_j}$ , we have

$$\begin{aligned} f_{\phi_j}(S_j^*) &\leq f_{\phi_j}(S_j^* \cup S_{i,j}) \\ &\leq f_{\phi_j}(S_{i,j}) + \sum_{v \in S_j^*} \Delta(v|S_{i,j}, \phi_j) \\ &\leq f_{\phi_j}(S_{i,j}) + T_j \sup_{x \in \Omega} \Delta(x|S_{i,j}, \phi_j) \\ &= f_{\phi_j}(S_{i,j}) + T_j(r_{i+1,j} + \Delta(x_{i+1,j}|S_{i,j}, \phi_j)) \\ &= f_{\phi_j}(S_{i,j}) + T_j(R_{i+1,j} - R_{i,j} + f_{\phi_j}(S_{i+1,j}) - f_{\phi_j}(S_{i,j})), \end{aligned} \tag{3}$$

where Eq. (3), we use the definition of  $r_{i+1,j}$ , i.e.,

$$r_{i+1,j} = \sup_{x \in \Omega} \Delta(x|S_{i,j}, \phi_j) - \Delta(x_{i+1,j}|S_{i,j}, \phi_j),$$

which yields

$$r_{i+1,j} + \Delta(x_{i+1,j}|S_{i,j}, \phi_j) = \sup_{x \in \Omega} \Delta(x|S_{i,j}, \phi_j).$$

Therefore, we have

$$f_{\phi_j}(S_j^*) - f_{\phi_j}(S_{i,j}) \leq T_j(R_{i+1,j} - R_{i,j} + f_{\phi_j}(S_{i+1,j}) - f_{\phi_j}(S_{i,j})).$$

Let  $\delta_{i,j} = f_{\phi_j}(S_j^*) - f_{\phi_j}(S_{i,j})$ . Then we have

$$\delta_{i,j} - \delta_{i+1,j} = (f_{\phi_j}(S_j^*) - f_{\phi_j}(S_{i,j})) - (f_{\phi_j}(S_j^*) - f_{\phi_j}(S_{i+1,j})) = f_{\phi_j}(S_{i+1,j}) - f_{\phi_j}(S_{i,j}).$$

Therefore, we obtain that

$$\delta_{i,j} \leq T_j(R_{i+1,j} - R_{i,j} + f_{\phi_j}(S_{i+1,j}) - f_{\phi_j}(S_{i,j})) \leq T_j(R_{i+1,j} - R_{i,j} + \delta_{i,j} - \delta_{i+1,j})$$

which entails

$$\delta_{i+1,j} \leq R_{i+1,j} - R_{i,j} + (1 - 1/T_j)\delta_{i,j}.$$

Hence for all  $i$ , we have

$$\delta_{i,j} \leq R_{i,j} - R_{i-1,j} + (1 - 1/T_j)\delta_{i-1,j}.$$

Note that  $f_{\phi_j}$  is normalized. Therefore,

$$\delta_{0,j} = f_{\phi_j}(S_j^*) - f_{\phi_j}(S_{0,j}) = f_{\phi_j}(S_j^*) - f_{\phi_j}(\emptyset) = f_{\phi_j}(S_j^*).$$

We recursively solve it with respect to  $\delta_{i,j}$  and obtain

$$\begin{aligned}
\delta_{i,j} &\leq \sum_{l=1}^i \left(1 - \frac{1}{T_j}\right)^{l-1} (R_{i-l+1,j} - R_{i-l,j}) + \left(1 - \frac{1}{T_j}\right)^i \delta_{0,j} \\
&\leq \sum_{l=1}^i \left(1 - \frac{1}{T_j}\right)^{l-1} (R_{i-l+1,j} - R_{i-l,j}) + \left(1 - \frac{1}{T_j}\right)^i f_{\phi_j}(S_j^*) \\
&= \sum_{l=0}^{i-1} \left(1 - \frac{1}{T_j}\right)^{i-l-1} (R_{l+1,j} - R_{l,j}) + \left(1 - \frac{1}{T_j}\right)^i f_{\phi_j}(S_j^*) \\
&= \sum_{1 \leq l \leq i} \left(1 - \frac{1}{T_j}\right)^{i-l} R_{l,j} - \sum_{0 \leq l \leq i-1} \left(1 - \frac{1}{T_j}\right)^{i-l-1} R_{l,j} + \left(1 - \frac{1}{T_j}\right)^i f_{\phi_j}(S_j^*) \\
&= R_{i,j} - \left(1 - \frac{1}{T_j}\right)^{i-1} R_{0,j} + \sum_{1 \leq l \leq i-1} \left[ \left(1 - \frac{1}{T_j}\right)^{i-l} - \left(1 - \frac{1}{T_j}\right)^{i-l-1} \right] R_{l,j} + \left(1 - \frac{1}{T_j}\right)^i f_{\phi_j}(S_j^*) \\
&= R_{i,j} - \frac{1}{T_j} \sum_{1 \leq l \leq i-1} \left(1 - 1/T_j\right)^{i-l-1} R_{l,j} + \left(1 - \frac{1}{T_j}\right)^i f_{\phi_j}(S_j^*) \\
&\leq R_{i,j} - \frac{1}{T_j} \sum_{1 \leq l \leq i-1} \left(1 - \frac{1}{T_j}\right)^{i-l-1} R_{l,j} + e^{-i/T_j} f_{\phi_j}(S_j^*).
\end{aligned}$$

Using  $\delta_{i,j} = f_{\phi_j}(S_j^*) - f_{\phi_j}(S_{i,j})$ , we obtain the following equation after some simple algebra

$$(1 - e^{-i/T_j}) f_{\phi_j}(S_j^*) \leq f_{\phi_j}(S_{i,j}) + R_{i,j} - \frac{1}{T_j} \sum_{1 \leq l \leq i-1} \left(1 - 1/T_j\right)^{i-l-1} R_{l,j} \leq f_{\phi_j}(S_{i,j}) + R_{i,j}.$$

Let  $i = T_j$  in the above equation and we immediately have

$$(1 - 1/e) f_{\phi_j}(S_j^*) \leq f_{\phi_j}(S_{T_j,j}) + R_{T_j,j},$$

which entails

$$(1 - 1/e) f_{\phi_j}(S_j^*) - f_{\phi_j}(S_{T_j,j}) \leq R_{T_j,j}.$$

Summing the above inequality over  $j$  yields

$$\begin{aligned}
\mathcal{R}_T &= (1 - 1/e) \sum_{j=1}^m f_{\phi_j}(S_j^*) - \sum_{j=1}^m f_{\phi_j}(S_{T_j,j}) \\
&\leq \sum_{j=1}^m R_{T_j,j} \\
&= \sum_{j=1}^m \sum_{i=1}^{T_j} r_{i,j}.
\end{aligned}$$

As shown above, we bound the regret  $\mathcal{R}_T$  by  $\sum_{j=1}^m \sum_{i=1}^{T_j} r_{i,j}$ . If we define the regret of each iteration (say, the  $i$ th iteration) as

$$r_i = \sup_{x \in \Omega} \Delta(x | S_{o_i-1, u_i}, \phi_{u_i}) - \Delta(x_{o_i, u_i} | S_{o_i-1, u_i}, \phi_{u_i}),$$

we have

$$\begin{aligned}
\sum_{i=1}^T r_i &= \sum_{i=1}^T \left( \sup_{x \in \Omega} \Delta(x | S_{o_i-1, u_i}, \phi_{u_i}) - \Delta(x_{o_i, u_i} | S_{o_i-1, u_i}, \phi_{u_i}) \right) \\
&= \sum_{i=1}^T r_{o_i, u_i} \\
&= \sum_{j=1}^m \sum_{1 \leq i \leq T, u_i=j} r_{o_i, u_i} \\
&= \sum_{j=1}^m \sum_{1 \leq i \leq T, u_i=j} r_{o_i, j} \\
&= \sum_{j=1}^m \sum_{i=1}^{T_j} r_{i, j}.
\end{aligned}$$

Therefore,  $\mathcal{R}_T$  is bounded by  $R_T$ , where  $R_T$  is defined as  $\sum_{i=1}^T r_i$ .

We can model the problem that we consider in this paper as a contextual bandit problem, where  $(S_{o_i-1, u_i}, \phi_{u_i})$  is the context at the  $i$ th iteration and the element to be selected is the action. By Theorem 1 in [31] (specifically, the third assumption in the theorem statement applies here), we have

$$\Pr \left\{ R_T \leq \sqrt{C_1 T \beta_T \gamma_T} + 2, \forall T \geq 1 \right\} \geq 1 - \delta.$$

Hence, we conclude that

$$\Pr \left\{ \mathcal{R}_T \leq \sqrt{C_1 T \beta_T \gamma_T} + 2, \forall T \geq 1 \right\} \geq 1 - \delta$$

since  $\mathcal{R}_T \leq R_T$  for all  $T \geq 1$ .
